# Supplementary material for: Expression of the AHPND Toxins PirAvp and PirBvp Is Regulated by Components of the Vibrio parahaemolyticus Quorum Sensing (QS) System
Source: MDPI journal article supplement (doi:10.3390/ijms23052889), 2022-03-07
Supplement: s1 [file s1]

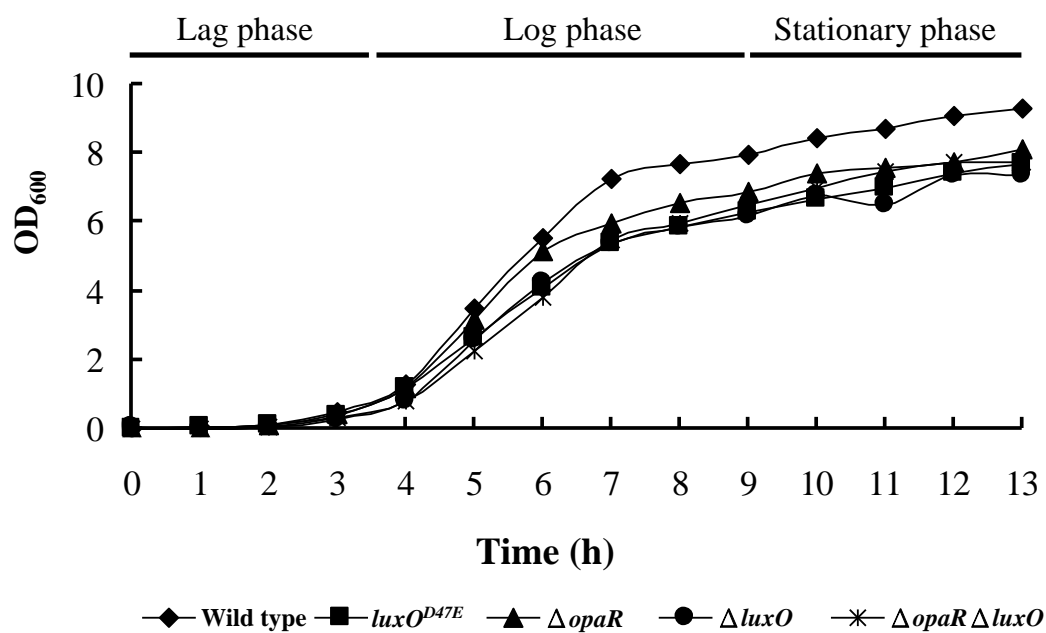

**Figure S1. Growth curve of *V. parahaemolyticus* strain 3HP and its mutants (*luxO*<sup>D47E</sup>,  $\Delta opaR$ ,  $\Delta luxO$ ,  $\Delta opaR \Delta luxO$ ).** Bacteria were cultured in LB+ medium (2% NaCl), and the growth curve was recorded every hour until 13 hours after inoculation. The growth rates were similar for all mutant strains and wild-type strains.
